# Supplementary material for: FFAR4 (GPR120) Signaling Is Not Required for Anti-Inflammatory and Insulin-Sensitizing Effects of Omega-3 Fatty Acids
Source: Hindawi journal article supplement (doi:10.1155/2016/1536047), 2016-01-01
Supplement: f1 [file 1536047.f1.pdf]

## Supplementary figure and table legends

### Supplementary figure 1 *Ffar4* WT and HET mice exhibit similar *Ffar4* mRNA levels.

*Ffar4* mRNA level measured by RT-qPCR, n= 18-20..

Data are presented as means  $\pm$  SEM. All genotypes have been compared to the KO. 1-way ANOVA with Bonferroni correction. \*\*\*\* $p < 0.0001$ .

### Supplementary Table 1 Detailed diet compositions

Unless otherwise noted, percentages describe the weight percentage.

## Supplementary Figures and Tables

### Supplementary Figure 1

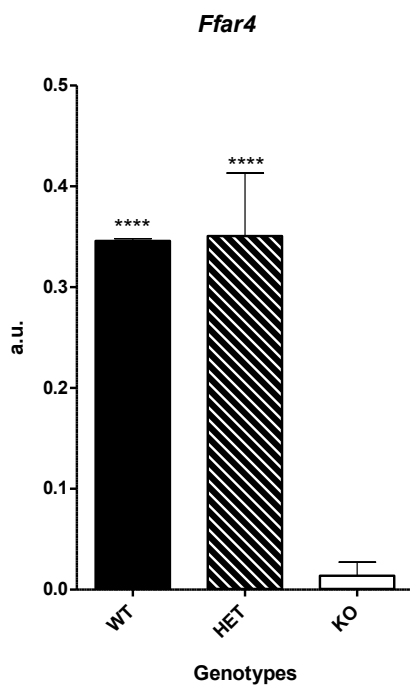

**Supplementary Table 1**

| Product No.<br>( <i>customized</i> ) |                 | <b>S8672-E0500</b>             | <b>S8672-E408</b>                    | <b>S8672-E409</b>                     |
|--------------------------------------|-----------------|--------------------------------|--------------------------------------|---------------------------------------|
|                                      |                 | <b>AIN mod.<br/>LF Control</b> | <b>AIN, SBO Oil<br/>High Sucrose</b> | <b>AIN, Fish Oil<br/>High Sucrose</b> |
|                                      | <b>Weight %</b> |                                |                                      |                                       |
| Casein                               | %               | 20,0000                        | 19,5000                              | 19,5000                               |
| Corn starch                          | %               | 52,0000                        | 5,0000                               | 5,0000                                |
| Maltodextrin                         | %               | —                              | 10,0000                              | 10,0000                               |
| Sucrose                              | %               | 9,7770                         | 31,6270                              | 31,6270                               |
| Cellulose powder                     | %               | 5,0000                         | 5,0000                               | 5,0000                                |
| L-Cystine                            | %               | 0,3000                         | 0,3000                               | 0,3000                                |
| DL-Methionine                        | %               | 0,1600                         | 0,1600                               | 0,1600                                |
| Vitamin premix                       | %               | 1,0000                         | 1,0000                               | 1,0000                                |
| Mineral premix                       | %               | 3,5000                         | 6,0000                               | 6,0000                                |
| Choline chloride                     | %               | 0,2500                         | 0,2500                               | 0,2500                                |
| Vitamin K3                           | %               | 0,0005                         | 0,0005                               | 0,0005                                |
| Vitamin B12                          | %               | 0,0025                         | 0,0025                               | 0,0025                                |
| Butylated<br>hydroxytoluene          | %               | 0,0100                         | 0,0100                               | 0,0100                                |
| Cholesterol                          | %               | —                              | 0,1500                               | 0,1500                                |
| Na CMC                               | %               | 1,0000                         | —                                    | —                                     |
| Soybean oil                          | %               | 7,0000                         | 21,0000                              | —                                     |
| Fish oil                             | %               | —                              | —                                    | 21,0000                               |
| Σ                                    |                 | 100,000                        | 100,000                              | 100,000                               |
| Crude protein                        | %               | 17,8                           | 17,3                                 | 17,3                                  |
| Crude fat                            | %               | 7,1                            | 21,1                                 | 21,1                                  |
| Crude fibre                          | %               | 5,0                            | 5,0                                  | 5,0                                   |
| Crude ash                            | %               | 3,4                            | 5,4                                  | 5,4                                   |
| Starch                               | %               | 50,0                           | 4,8                                  | 4,8                                   |
| Sugar                                |                 | 10,9                           | 32,5                                 | 32,5                                  |
|                                      | <b>Energy %</b> |                                |                                      |                                       |
| ME (Atwater) MJ/kg                   |                 | 16,0                           | 19,0                                 | 19,0                                  |
| Protein                              | %               | 19                             | 15                                   | 15                                    |
| Fat                                  | %               | 17                             | 42                                   | 42                                    |
| CHO                                  | %               | 64                             | 43                                   | 43                                    |
| <i>Fatty acids in the diet</i>       | <b>Weight %</b> |                                |                                      |                                       |
| C14:0                                | %               | 0,02                           | 0,02                                 | 1,59                                  |
| C15:0                                | %               | —                              | —                                    | 0,12                                  |
| C16:0                                | %               | 0,79                           | 2,44                                 | 3,90                                  |
| C17:0                                | %               | —                              | —                                    | 0,13                                  |
| C18:0                                | %               | 0,25                           | 0,75                                 | 0,82                                  |
| C16:1                                | %               | 0,01                           | 0,02                                 | 1,77                                  |
| C18:1                                | %               | 1,78                           | 5,27                                 | 2,40                                  |
| C18:2                                | %               | 3,71                           | 11,06                                | 0,30                                  |
| C18:3                                | %               | 0,40                           | 1,22                                 | 0,16                                  |
| C18:4                                | %               | 0,01                           | 0,02                                 | 0,64                                  |
| C20:0                                | %               | 0,03                           | 0,08                                 | 0,12                                  |
| C20:1                                | %               | 0,02                           | 0,05                                 | 0,44                                  |
| C20:4                                | %               | —                              | —                                    | 0,19                                  |
| C20:5                                | %               | —                              | —                                    | 3,68                                  |
| C22:1                                | %               | —                              | —                                    | 0,09                                  |
| C22:5                                | %               | —                              | —                                    | 0,41                                  |
| C22:6                                | %               | —                              | —                                    | 2,54                                  |
